# Supplementary material for: Memo Has a Novel Role in S1P Signaling and Crucial for Vascular Development
Source: PubMed Central journal article supplement (PMC3979765; doi:10.1371/journal.pone.0094114), 2014-04-08
Supplement: pone.0094114.s008.pdf [file pone.0094114.s008.pdf]

Table S1  
*Primer pairs used for qPCR*

| Gene Name   | Primer pair                                                 |
|-------------|-------------------------------------------------------------|
| Mouse SphK1 | 5'-GGAACCTTGACTGTCCATACC-3'<br>5'-TACCATCAGCTCTCCATCC-3'    |
| Mouse SphK2 | 5'-GCACGGCGAGTTTGGTTC-3'<br>5'-GAGACCTCATCCAGAGAGACTAG-3'   |
| Mouse S1PR1 | 5'-TTTCATCTGCTGCTTCATCATCC-3'<br>5'-GGTCCGAGAGGGCTAGGTTG-3' |
| Mouse S1PR3 | 5'-AAGCCTAGCGGGAGAGAAAC-3'<br>5'-TCAGGGAACAATTGGGAGAG-3'    |
| Mouse Actin | 5'-TGCGTGACATCAAAGAGAAG-3'<br>5'-GATGCCACAGGATTCCATA-3'     |
| Human SphK1 | 5'-CTTGCAGCTCTTCCGGAGTC-3'<br>5'-GCTCAGTGAGCATCAGCGTG-3'    |
| Human SphK2 | 5'-CTGTCTGCTCCGAGGACTGC-3'<br>5'-CAAAGGGATTGACCAATAGAAGC-3' |
| Human S1PR1 | 5'-TGCGGGAAGGGAGTATGTTT-3'<br>5'-CGATGGCGAGGAGACTGAAC-3'    |
| Human S1PR3 | 5'-TGATTGTGGTGAGCGTGTTC-3'<br>5'-GGCCACATCAATGAGGAAGAG-3'   |
| Human GAPDH | 5'-GAAGGTGAAGGTCGGAGTC-3'<br>5'-GAAGATGGTGATGGGATTTTC-3'    |
