# Supplementary material for: Memo Has a Novel Role in S1P Signaling and Crucial for Vascular Development
Source: PubMed Central journal article supplement (PMC3979765; doi:10.1371/journal.pone.0094114), 2014-04-08
Supplement: pone.0094114.s009.pdf [file pone.0094114.s009.pdf]

Table S2

*Analysis of embryos from Memo +/- intercrosses*

*Memo +/-* males and females were mated and the genotype of the offspring at the indicated ages was analyzed. The number of embryos with the indicated genotype are listed; the numbers of dead embryos, as judged by the absence of a heartbeat is in the ( ). \* % live *Memo -/-* / total live embryos.

| Age   | <i>Memo</i> |        |         | % <i>Memo -/-</i> * |
|-------|-------------|--------|---------|---------------------|
|       | +/+         | +/-    | -/-     |                     |
| E11.5 | 4           | 9      | 8       | 38                  |
| E12.5 | 21          | 85     | 34      | 24                  |
| E13.5 | 16 (1)      | 47     | 22 (1)  | 26                  |
| E14.5 | 28          | 60 (1) | 22 (10) | 20                  |
| E15.5 | 16          | 27 (2) | 8 (10)  | 16                  |
| E16.5 | 12          | 29     | 2 (4)   | 5                   |
| E17.5 | 4           | 20     | 1 (2)   | 4                   |
| E18.5 | 9           | 11     | 0 (2)   | 0                   |
